# Supplementary material
Source: MDPI journal article supplement (https://www.mdpi.com/2073-4352/14/3/231)
Supplement: s1 [file s1]

## Article

# Supplementary information: Defect modes originating in a stack of spin coated CLC layers

Frederik Van Acker <sup>1,\*</sup> , Bo-han Lin <sup>2</sup>, Chun-ta Wang <sup>2</sup> , Kristiaan Neyts <sup>3</sup>  and Jeroen Beeckman <sup>1</sup> 

<sup>1</sup> Department of Electronics and Information Systems (ELIS), Ghent University, Technologiepark 126, Ghent, Belgium; jeroen.beeckman@ugent.be

<sup>2</sup> Department of Photonics, National Sun Yat-Sen University, Kaohsiung, Taiwan; wangchunta4@gmail.com

<sup>3</sup> State Key Lab of Advanced Displays and Optoelectronics Technologies, Hong Kong University of Science and Technology, Hong Kong; eeneyts@ust.hk

\* Correspondence: frederikg.vanacker@ugent.be; Tel.: +32-9-264-3337

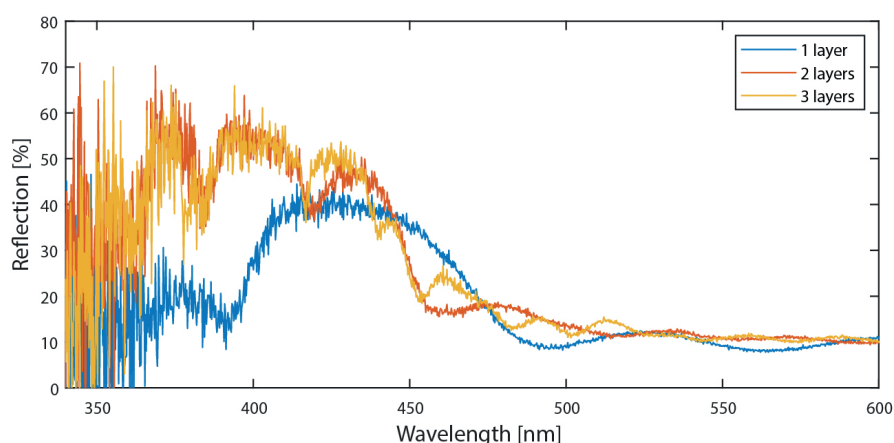

**Figure S1.** Reflection spectra of the 1, 2 and 3 layered blue CLC.

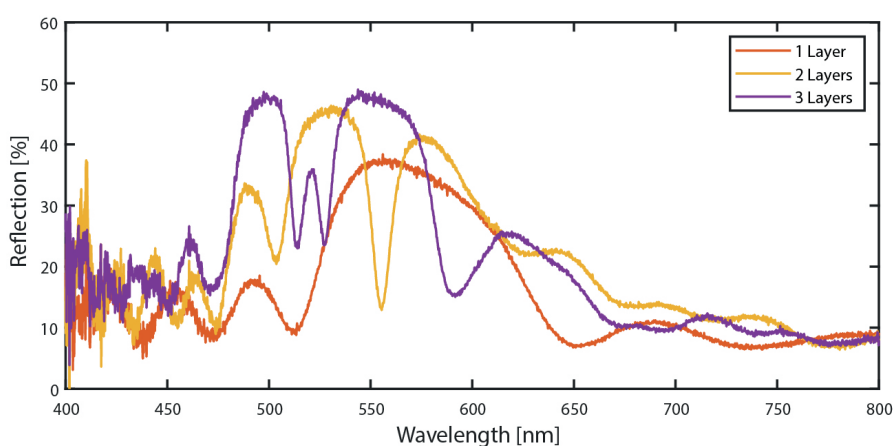

**Figure S2.** Reflection spectra of a sample cured at a UV intensity of 20 mW/cm<sup>2</sup> for 5 minutes after 1, 2 and 3 deposited layers.

**Citation:** Van Acker, F.; Lin, B.-H.; Wang, C.-T.; Neyts, K.; Beeckman, J. Supplementary information: Defect modes originating in a stack of spin coated CLC layers. *Crystals* **2024**, *14*, 231. <https://doi.org/10.3390/cryst14030231>

Academic Editor: Ingo Dierking

Received: 14 February 2024

Revised: 23 February 2024

Accepted: 24 February 2024

Published: 28 February 2024

**Copyright:** © 2024 by the authors. Submitted to *Crystals* for possible open access publication under the terms and conditions of the Creative Commons Attribution (CC BY) license (<https://creativecommons.org/licenses/by/4.0/>).

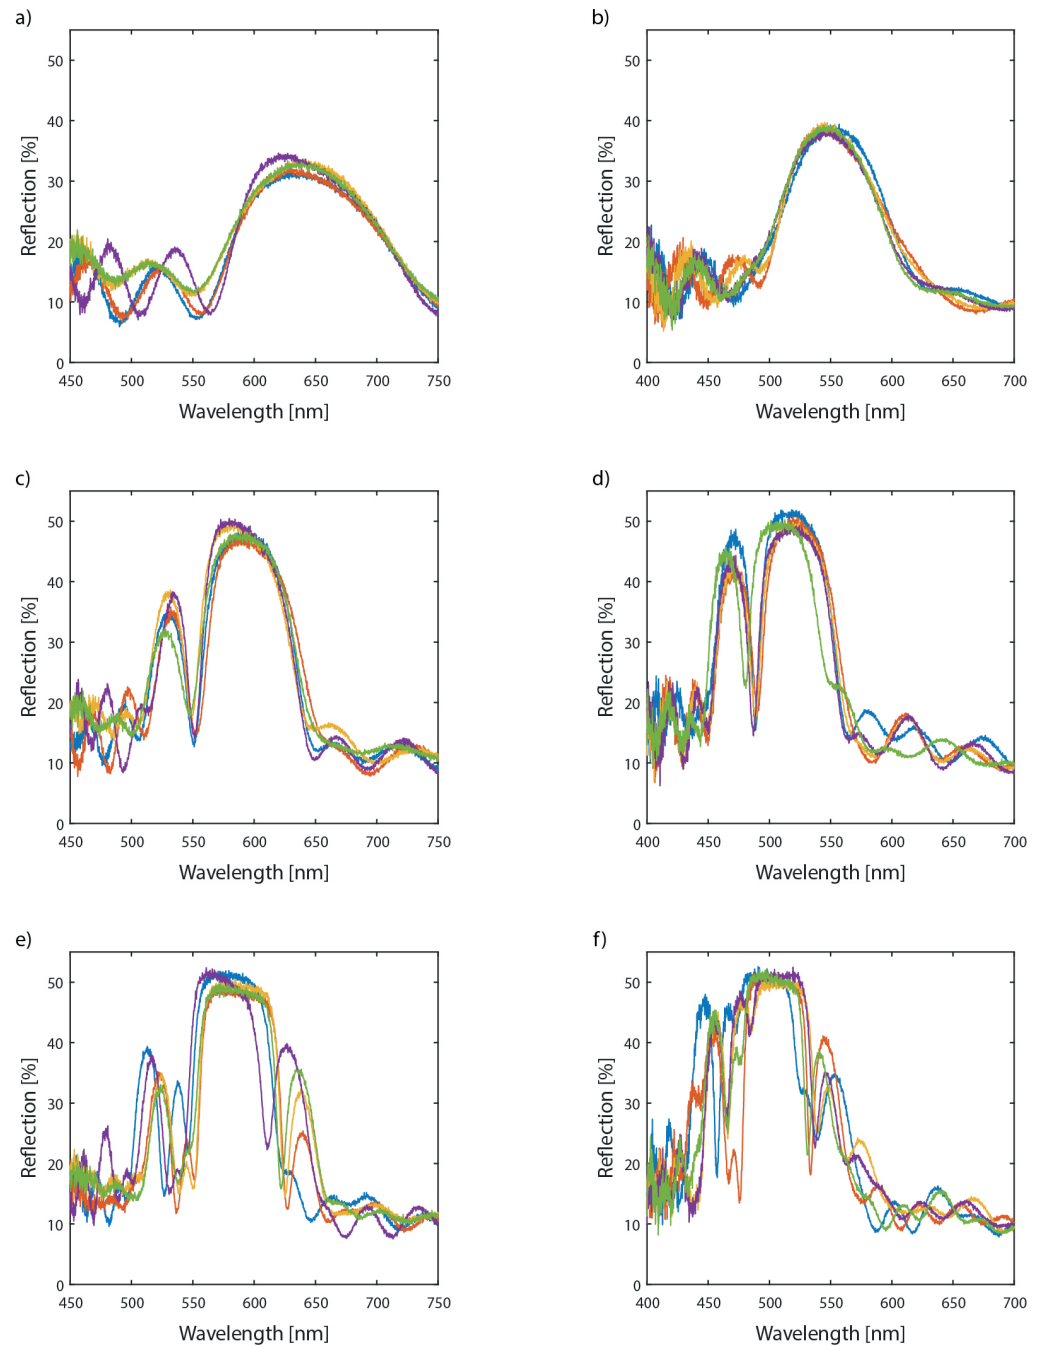

**Figure S3.** The reflection spectra of 5 different devices made with the same method, from the same spin coating mixture. We can see a close resemblance between the spectra, showing repeatability. (a) and (b) 1 layer red and green CLC respectively, (c) and (d) 2 layer red and green CLC respectively, (e) and (f) 3 layers red and green CLC respectively,
